# Supplementary material for: Rutile nano–bio-interactions mediate dissimilar intracellular destiny in human skin cells
Source: Royal Society of Chemistry journal article supplement (doi:10.1039/c9na00078j), 2019-01-01
Supplement: c9na00078j1.pdf [file c9na00078j1.pdf]

## Supporting Information

### Rutile nano-bio-interactions mediate dissimilar intracellular destiny in human skin cells

P.L. Sanches<sup>a,b,c†</sup>, W. Souza<sup>a,c,d</sup>, S. Gemini-Piperni<sup>c,e</sup>, A.L. Rossi<sup>e</sup>, S. Scapin<sup>a</sup>, V. Midlej<sup>f</sup>, Y. Sade<sup>a</sup>, A.F. Paes Leme<sup>g</sup>, M. Benchimol<sup>b,f</sup>, L.A. Rocha<sup>c,h</sup>, R.B.V. Carias<sup>i</sup>, R. Borojevic<sup>i</sup>, J.M. Granjeiro<sup>a,b,c,d,j</sup>, A.R. Ribeiro<sup>b,c,d\*</sup>

**Table S1.** TiO<sub>2</sub> NPs stability test in culture medium

|      | DMEM 10% FBS | KGM         |
|------|--------------|-------------|
| 0 H  | 258.2 ±0.13  | 266.2 ±0.15 |
| 24 H | 236 ±14      | 254,8 ±17,7 |

\*Average of three independent experiments
